# Supplementary material for: Tissue-selective alternate promoters guide NLRP6 expression
Source: Life Sci Alliance. 2020 Dec 29;4(3):e202000897. doi: 10.26508/lsa.202000897 (PMC7772780; doi:10.26508/lsa.202000897)
Supplement: Supplementary file 1 [file LSA-2020-00897_TableS1.xlsx]

## Sheet: Sup_tab_1
Gene	Kidney	Intestine	Heart	Lung	Bone Marrow	Liver	Spleen	Brain	Total_Count	Type
NLRP1	3	3	2	3	4	2	4	2	4	NLR
NLRP2	1	1	0	0	0	0	0	1	1	NLR
NLRP3	1	1	1	1	1	1	1	1	1	NLR
NLRP4	0	0	0	0	0	0	0	0	0	NLR
NLRP5	0	0	0	0	1	0	0	0	0	NLR
NLRP6	3	3	1	1	1	2	2	1	3	NLR
NLRP7	0	0	0	0	0	0	0	0	0	NLR
NLRP8	0	0	0	0	0	0	0	0	0	NLR
NLRP9	0	0	0	0	0	0	0	0	0	NLR
NLRP10	0	0	0	0	2	0	0	0	2	NLR
NLRP11	0	0	0	0	0	0	0	0	0	NLR
NLRP12	1	0	1	1	1	1	1	0	1	NLR
NLRP13	0	0	0	0	1	0	0	0	1	NLR
NLRP14	0	0	0	0	0	0	0	0	0	NLR
MNDA	1	1	1	1	3	1	3	1	3	non-NLR
PYHIN	0	0	0	0	0	0	0	0	0	non-NLR
IFI16	5	3	4	4	8	3	6	4	8	non-NLR
AIM2	1	1	1	1	1	1	1	1	1	non-NLR
MEFV	1	1	1	1	1	1	1	1	1	non-NLR
PYCARD	1	1	1	1	2	1	3	1	3	non-NLR
PYDC1	0	0	0	0	0	0	0	0	0	non-NLR
